# Supplementary material for: DNA barcoding for identification of anuran species in the central region of South America
Source: PeerJ. 2020 Oct 21;8:e10189. doi: 10.7717/peerj.10189 (PMC7585382; doi:10.7717/peerj.10189)
Supplement: Supplemental Information 2 — Shown in yellow are the estimate coordinates of the locality or city center, considering that these records did not have this information. [file peerj-08-10189-s002.xlsx]

## Sheet: Table S1
Sequence Name	Genbank/BOLD number	Deposit number	Genus	Species	Country	State/Departament	Municipality	Locality	Lat	Log	Reference collection	Collectors
Adenomera_diptyx_MAP_T2511	MT583090	MAP-T2511	Adenomera	dyptyx	Brazil	Mato Grosso do Sul	Corumbá	Baía Negra	-19.0222	-57.5106	ZUFMS	Karoline Ceron, Liliana Piatti, Guilherme Sestito, Matheus Moroti, Francisco Severo-Neto
Adenomera_diptyx_KF674596	KF674596	CFBHT7463	Adenomera	diptyx	Brazil	Mato Grosso do Sul	Corumbá		-18.9775	-57.6351	CFBH
Adenomera_hylaedactyla_KF674679	KF674679	AF1570	Adenomera	hylaedactyla	Brazil	Mato Grosso do Sul	Sonora	UHE Ponte de Pedra	-17.4667	-53.9142
Ameerega_berohoka_MAP_T1114	MT583091	MAP-T1114	Ameerega	berohoka	Brazil	Mato Grosso do Sul	Corguinho		-19.8277	-54.8315	ZUFMS
Ameerega_berohoka_MAP_T4530	MT583092	MAP-T4530	Ameerega	berohoka	Brazil	Mato Grosso do Sul	Aquidauana	Riacho do Paxixi	-20.4511	-55.6211	ZUFMS	Santana, D.J.; Mângia, S.; Neves, M.; Nehemy, I.
Ameerega_picta_MAP_T169	MT583095	MAP-T169	Ameerega	picta	Brazil	Mato Grosso do Sul	Bonito		-21.126	-56.4899	ZUFMS	Santana, D.J.; Sugai, J.L.M., Dias, R.
Ameerega_picta_MAP_T165	MT583093	MAP-T165	Ameerega	picta	Brazil	Mato Grosso do Sul	Bonito		-21.126	-56.4899	ZUFMS	Santana, D.J.; Sugai, J.L.M., Dias, R.
Ameerega_picta_MAP_T166	MT583094	MAP-T166	Ameerega	picta	Brazil	Mato Grosso do Sul	Bonito		-21.126	-56.4899	ZUFMS	Santana, D.J.; Sugai, J.L.M., Dias, R.
Boana_albopunctata_MAP_T4089	MT583096	MAP-T4089	Boana	albopunctata	Brazil	Mato Grosso do Sul	Campo Grande	Brejo Bonito	-20.5131	-54.7277	ZUFMS	Moroti, M.; Pedrozo, M.
Boana_albopunctata_MAP_T3076	MT583097	MAP-T3076	Boana	albopunctata	Brazil	Mato Grosso do Sul	Alcinópolis	PENRTaquari (Canions 1ª lagoa)	-18.1594	-53.4108	ZUFMS	Santana, D; Sugai, J. L; Carvalho, P.S; Ceron, K; Neves, M; Moroti; Pedrozo, M; Díaz, J; Sestito, G; Folly, H; Oliveira, I.C; Ragalzi, E
Boana_albopunctata_MAP_T1943	MT583098	MAP-T1943	Boana	albopunctata	Brazil	Mato Grosso do Sul	Alcinópolis	PENT	-18.1588	-53.4177	ZUFMS	Karoline Ceron, Diego Santana, Sarah Mangia, Priscila Carvalho
Boana_albopunctata_MAP_T1929	MT583099	MAP-T1929	Boana	albopunctata	Brazil	Mato Grosso do Sul	Camapuã	Fazenda 7 irmãos	-19.025	-53.8553	ZUFMS	Karoline Ceron, Diego Santana, Sarah Mangia, Priscila Carvalho, José Luiz Massao Sugai
Boana_geographica_MAP_T2666	MT583100	MAP-T2666	Boana	geographica	Brazil	Mato Grosso do Sul	Camapuã	Fazenda 7 irmãos	-19.025	-53.8553	ZUFMS	Karoline Ceron, José L. Massao, Guilherme Sestito, Henrique Folly
Boana_lundii_MAP_T3043	MT583101	MAP-T3043	Boana	lundii	Brazil	Mato Grosso do Sul	Alcinópolis	PENRTaquari (Águas emendadas)	-18.1594	-53.4108	ZUFMS	Santana, D; Sugai, J. L; Carvalho, P.S; Ceron, K; Neves, M; Moroti; Pedrozo, M; Díaz, J; Sestito, G; Folly, H; Oliveira, I.C; Ragalzi, E
Boana_punctata_MAP_T4061	MT583102	MAP-T4061	Boana	punctata	Brazil	Mato Grosso do Sul	Campo Grande	Brejo Bonito	-20.5131	-54.7277	ZUFMS	Moroti, M.; Pedrozo, M.
Boana_punctata_MAP_T2644	MT583103	MAP-T2644	Boana	punctata	Brazil	Mato Grosso do Sul	Alcinópolis	PENRT	-18.1588	-53.4177	ZUFMS	Karoline Ceron, José L. Massao, Jorge A. Díaz-Perez
Boana_punctata_MAP_T2660	MT583104	MAP-T2660	Boana	punctata	Brazil	Mato Grosso do Sul	Camapuã	Fazenda 7 irmãos	-19.025	-53.8553	ZUFMS	Karoline Ceron, José L. Massao, Guilherme Sestito, Henrique Folly
Boana_raniceps_MAP_T2978	MT583106	MAP-T2978	Boana	raniceps	Brazil	Mato Grosso do Sul	Alcinópolis	PENRTaquari (lagoa)	-18.1594	-53.4108	ZUFMS	Santana, D; Sugai, J. L; Carvalho, P.S; Ceron, K; Neves, M; Moroti; Pedrozo, M; Díaz, J; Sestito, G; Folly, H; Oliveira, I.C; Ragalzi, E
Boana_raniceps_MAP_T2599	MT583107	MAP-T2599	Boana	raniceps	Brazil	Mato Grosso do Sul	Porto Murtinho		-21.6991	-57.8895	ZUFMS	Santana, D; Carvalho, P; Ragalzi, E; Severo Neto, F
Boana_raniceps_MAP_T1375	MT583108	MAP-T1375	Boana	raniceps	Brazil	Mato Grosso do Sul	Corumbá	Base de Estudos do Pantanal - BEP UFMS	-19.5769	-57.0192	ZUFMS
Boana_raniceps_MAP_T2504	MT583105	MAP-T2504	Boana	raniceps	Brazil	Mato Grosso do Sul	Bonito	Estância Mimosa	-20.9685	-56.5211	ZUFMS	Karoline Ceron, Diego Santana, Mauricio Gomes, Eric Ragalzi
Chiasmocleis_albopunctata_MAP_T2901	MT583109	MAP-T2901	Chiasmocleis	albopunctata	Brazil	Mato Grosso do Sul	Alcinópolis	PENRTaquari (Brejo lagoa estrada)	-18.1594	-53.4108	ZUFMS	Santana, D; Sugai, J. L; Carvalho, P.S; Ceron, K; Neves, M; Moroti; Pedrozo, M; Díaz, J; Sestito, G; Folly, H; Oliveira, I.C; Ragalzi, E
Chiasmocleis_albopunctata_MAP_T3125	MT583110	MAP-T3125	Chiasmocleis	albopunctata	Brazil	Mato Grosso do Sul	Alcinópolis	PENRTaquari (Canions lagoa Chiasmocleis)	-18.1594	-53.4108	ZUFMS	Santana, D; Sugai, J. L; Carvalho, P.S; Ceron, K; Neves, M; Moroti; Pedrozo, M; Díaz, J; Sestito, G; Folly, H; Oliveira, I.C; Ragalzi, E
Chiasmocleis_albopunctata_MAP_T4073	MT583111	MAP-T4073	Chiasmocleis	albopunctata	Brazil	Mato Grosso do Sul	Campo Grande	Brejo Bonito	-20.5131	-54.7277	ZUFMS	Moroti, M.; Pedrozo, M.
Dendropsophus_elianeae_MAP_T3061	MT583112	MAP-T3061	Dendropsophus	elianeae	Brazil	Mato Grosso do Sul	Alcinópolis	PENRTaquari (Canions lagoa elianeae)	-18.1594	-53.4108	ZUFMS	Santana, D; Sugai, J. L; Carvalho, P.S; Ceron, K; Neves, M; Moroti; Pedrozo, M; Díaz, J; Sestito, G; Folly, H; Oliveira, I.C; Ragalzi, E
Dendropsophus_elianeae_MAP_T892	MT583113	MAP-T892	Dendropsophus	elianeae	Brazil	Mato Grosso do Sul	Selvíria	FEPE, UNESP, Córrego da Véstia	-20.3828	-51.4211	ZUFMS
Dendropsophus_jimi_MAP_T3029	MT583115	MAP-T3029	Dendropsophus	jimi	Brazil	Mato Grosso do Sul	Alcinópolis	PENRTaquari (Águas emendadas)	-18.1594	-53.4108	ZUFMS	Santana, D; Sugai, J. L; Carvalho, P.S; Ceron, K; Neves, M; Moroti; Pedrozo, M; Díaz, J; Sestito, G; Folly, H; Oliveira, I.C; Ragalzi, E
Dendropsophus_jimi_MAP_T2685	MT583114	MAP-T2685	Dendropsophus	minutus	Brazil	Mato Grosso do Sul	Alcinópolis	PENRTaquari (trilha da lagoa)	-18.1594	-53.4108	ZUFMS	Santana, D; Sugai, J. L; Carvalho, P.S; Ceron, K; Neves, M; Moroti; Pedrozo, M; Díaz, J; Sestito, G; Folly, H; Oliveira, I.C; Ragalzi, E
Dendropsophus_minutus_MAP_T2500	MT583119	MAP-T2500	Dendropsophus	minutus	Brazil	Mato Grosso do Sul	Aquidauana	Barranco Alto	-19.5721	-56.1531	ZUFMS	Karoline Ceron, Liliane Piatti, Guilherme Sestito, Matheus Neves
Dendropsophus_minutus_MAP_T238	MT583120	MAP-T238	Dendropsophus	minutus	Brazil	Mato Grosso do Sul	Camapuã	Fazenda 7 Irmãos	-19.0353	-53.8957	ZUFMS	Sugai,J.L.M
Dendropsophus_nanus_MAP_T2558	MT583121	MAP-T2558	Dendropsophus	nanus	Brazil	Mato Grosso do Sul	Porto Murtinho		-21.6991	-57.8895	ZUFMS	Santana, D; Carvalho, P; Ragalzi, E; Severo Neto, F
Dendropsophus_nanus_MAP_T2436	MT583122	MAP-T2436	Dendropsophus	nanus	Brazil	Mato Grosso do Sul	Aquidauana	Barranco Alto	-19.5721	-56.1531	ZUFMS	Karoline Ceron, Liliane Piatti, Guilherme Sestito, Matheus Neves
Dermatonotus_muelleri_MAP_T869	MT583123	MAP-T869	Dermatonotus	muelleri	Brazil	Mato Grosso do Sul	Selvíria	FEPE UNESP Corrego da Véstia	-20.3828	-51.4211	ZUFMS
Dermatonotus_muelleri_DBABA386_	KU494424	CFBHT11572	Dermatonotus	muelleri	Brazil	Mato Grosso do Sul	Três Lagoas		-20.77	-51.71	CFBH	Celio F. B. Haddad
Dermatonotus_muelleri_DBABA387_	KU494422	CFBHT11818	Dermatonotus	muelleri	Brazil	Mato Grosso do Sul	Três Lagoas		-20.77	-51.71	CFBH	Celio F. B. Haddad
Dermatonotus_muelleri_MAP_T834	MT583124	MAP-T834	Dermatonotus	muelleri	Brazil	Mato Grosso do Sul	Terenos		-20.4405	-54.8648	ZUFMS
Dermatonotus_muelleri_MAP_T3129	MT583125	MAP-T3129	Dermatonotus	muelleri	Brazil	Mato Grosso do Sul	Alcinópolis	PENRTaquari (sede)	-18.1594	-53.4108	ZUFMS	Santana, D; Sugai, J. L; Carvalho, P.S; Ceron, K; Neves, M; Moroti; Pedrozo, M; Díaz, J; Sestito, G; Folly, H; Oliveira, I.C; Ragalzi, E
Elachistocleis_bicolor_MAP_T893	MT583126	MAP-T893	Elachistocleis	bicolor	Brazil	Mato Grosso do Sul	Selvíria	FEPE, UNESP, Córrego da Véstia	-20.3828	-51.4211	ZUFMS
Elachistocleis_bicolor_DBABA394	KU494428	CFBHT12489	Elachistocleis	bicolor	Brazil	Mato Grosso do Sul	Tres Lagoas		-20.77	-51.71	CFBH	Celio F. B. Haddad
Elachistocleis_bicolor_MAP_T4473	MT583127	MAP-T4473	Elachistocleis	bicolor	Brazil	Mato Grosso do Sul	Jateí	Parque Estadual das Várzeas do Rio Ivinhema	-22.9218	-53.6571	ZUFMS	Karoline Ceron, Diego Santana, Giuseppe Michelin, Jorge Diaz
Elachistocleis_bicolor_MAP_T4474	MT583128	MAP-T4474	Elachistocleis	bicolor	Brazil	Mato Grosso do Sul	Jateí	Parque Estadual das Várzeas do Rio Ivinhema	-22.9218	-53.6571	ZUFMS	Karoline Ceron, Diego Santana, Giuseppe Michelin, Jorge Diaz
Elachistocleis_cesarii_MAP_T2617	MT583129	MAP-T2617	Elachistocleis	cesarii	Brazil	Mato Grosso do Sul	Campo Grande	Fazenda Santa Fé	-20.5388	-54.7514	ZUFMS	Moroti, M; Pedrozo, M
Elachistocleis_cesarii_MAP_T3080	MT583130	MAP-T3080	Elachistocleis	cesarii	Brazil	Mato Grosso do Sul	Alcinópolis	PENRTaquari (Canions 1ª lagoa)	-18.1594	-53.4108	ZUFMS	Santana, D; Sugai, J. L; Carvalho, P.S; Ceron, K; Neves, M; Moroti; Pedrozo, M; Díaz, J; Sestito, G; Folly, H; Oliveira, I.C; Ragalzi, E
Elachistocleis_cesarii_MAP_T3123	MT583131	MAP-T3123	Elachistocleis	cesarii	Brazil	Mato Grosso do Sul	Alcinópolis	PENRTaquari (Canions lagoa Chiasmocleis)	-18.1594	-53.4108	ZUFMS	Santana, D; Sugai, J. L; Carvalho, P.S; Ceron, K; Neves, M; Moroti; Pedrozo, M; Díaz, J; Sestito, G; Folly, H; Oliveira, I.C; Ragalzi, E
Elachistocleis_matogrosso_MAP_T1363	MT583132	MAP-T1363	Elachistocleis	matogrosso	Brazil	Mato Grosso do Sul	Corumbá	Base de Estudos do Pantanal - BEP UFMS	-19.5769	-57.0192	ZUFMS
Elachistocleis_matogrosso_MAP_T2475	MT583133	MAP-T2475	Elachistocleis	matogrosso	Brazil	Mato Grosso do Sul	Aquidauana	Barranco Alto	-19.5721	-56.1531	ZUFMS	Karoline Ceron, Liliane Piatti, Guilherme Sestito, Matheus Neves
Lepidobatrachus_laevis_MG8130833	MG813083	ZUFMS2638	Lepidobatrachus	laevis	Brazil	Mato Grosso do Sul	Porto Murtinho		-21.6903	-57.7211	ZUFMS
Lepidobatrachus_laevis_MG8130844	MG813084	ZUFMS2639	Lepidobatrachus	laevis	Brazil	Mato Grosso do Sul	Porto Murtinho		-21.6903	-57.7211	ZUFMS
Lepidobatrachus_laevis_MG8130855	MG813085	ZUFMS2640	Lepidobatrachus	laevis	Brazil	Mato Grosso do Sul	Porto Murtinho		-21.6903	-57.7211	ZUFMS
Lepidobatrachus_laevis_MG8130866	MG813086	ZUFMS2641	Lepidobatrachus	laevis	Brazil	Mato Grosso do Sul	Porto Murtinho		-21.6903	-57.7211	ZUFMS
Leptodactylus_bufonius_MAP_T2571	MT583134	MAP-T2571	Leptodactylus	bufonius	Brazil	Mato Grosso do Sul	Porto Murtinho		-21.6991	-57.8895	ZUFMS	Santana, D; Carvalho, P; Ragalzi, E; Severo Neto, F
Leptodactylus_bufonius_MK342716	MK342716	CFBH 30490	Leptodactylus	bufonius	Brazil	Mato Grosso do Sul	Porto Murtinho	20km E from PM	-21.71	-57.721	CFBH
Leptodactylus_bufonius_MK342717	MK342717	CFBH 30491	Leptodactylus	bufonius	Brazil	Mato Grosso do Sul	Porto Murtinho	20km E from PM	-21.71	-57.721	CFBH
Leptodactylus_bufonius_MK342718	MK342718	CFBH 30492	Leptodactylus	bufonius	Brazil	Mato Grosso do Sul	Porto Murtinho	20km E from PM	-21.71	-57.721	CFBH
Leptodactylus_chaquensis_DBABA483-12	KU494547	CFBHT01339	Leptodactylus	chaquensis	Brazil	Mato Grosso do Sul	Costa Rica		-18.53	-53.122	CFBH	Celio F. B. Haddad
Leptodactylus_chaquensis_DBAFI074-12	KU494519	CFBHT04560	Leptodactylus	chaquensis	Brazil	Mato Grosso do Sul	Bonito		-21.157	-56.647	CFBH
Leptodactylus_chaquensis_DBAFI089-12	KU494520	CFBHT11586	Leptodactylus	chaquensis	Brazil	Mato Grosso do Sul	Três Lagoas	Fazenda Barra do Moeda	-20.77	-51.71	CFBH
Leptodactylus_chaquensis_MAP_T1142	MT583135	MAP-T1142	Leptodactylus	chaquensis	Brazil	Mato Grosso do Sul	Aquidauana	Morro do Paxixi Camisão	-20.448	-55.6464	ZUFMS
Leptodactylus_chaquensis_MAP_T3159	MT583136	MAP-T3159	Leptodactylus	chaquensis	Brazil	Mato Grosso do Sul	Alcinópolis	PENRTaquari (lagoa Moroti)	-18.1594	-53.4108	ZUFMS	Santana, D; Sugai, J. L; Carvalho, P.S; Ceron, K; Neves, M; Moroti; Pedrozo, M; Díaz, J; Sestito, G; Folly, H; Oliveira, I.C; Ragalzi, E
Leptodactylus_chaquensis_MAP_T4488	MT583137	MAP-T4488	Leptodactylus	chaquensis	Brazil	Mato Grosso do Sul	Três Lagoas	Lagoa	-20.7727	-51.7158	ZUFMS	Karoline Ceron, Carla Guimarães, Pedro Rocha
Leptodactylus_elenae_MAP_T1379	MT583138	MAP-T1379	Leptodactylus	elenae	Brazil	Mato Grosso do Sul	Corumbá	Base de Estudos do Pantanal - BEP UFMS	-19.5769	-57.0192	ZUFMS
Leptodactylus_elenae_MAP_T2554	MT583139	MAP-T2554	Leptodactylus	elenae	Brazil	Mato Grosso do Sul	Porto Murtinho		-21.6991	-57.8895	ZUFMS	Santana, D; Carvalho, P; Ragalzi, E; Severo Neto, F
Leptodactylus_elenae_MAP_T4359	MT583140	MAP-T4359	Leptodactylus	elenae	Brazil	Mato Grosso do Sul	Campo Grande	Fazenda Santa Fé (Brejo Bonito)	-20.5377	-54.7543	ZUFMS	Santana, D. J. e alunos
Leptodactylus_furnarius_MAP_T1936	MT583141	MAP-T1936	Leptodactylus	furnarius	Brazil	Mato Grosso do Sul	Camapuã	Fazenda 7 irmãos	-19.025	-53.8553	ZUFMS	Karoline Ceron, Diego Santana, Sarah Mangia, Priscila Carvalho, José Luiz Massao Sugai
Leptodactylus_fuscus_MAP_T167	MT583142	MAP-T167	Leptodactylus	fuscus	Brazil	Mato Grosso do Sul	Bonito		-21.126	-56.4899	ZUFMS	Santana, D.J.;Sugai,J.L.M.;Dias,R.
Leptodactylus_labyrinthicus_MAP_T2626	MT583144	MAP-T2626	Leptodactylus	labyrinthicus	Brazil	Mato Grosso do Sul	Bonito	Estância Mimosa	-20.9685	-56.5211	ZUFMS	Karoline Ceron, Diego José Santana, Sarah Mângia, Matheus Neves, Jorge Díaz
Leptodactylus_labyrinthicus_MAP_T1153	MT583143	MAP-T1153	Leptodactylus	labyrinthicus	Brazil	Mato Grosso do Sul	Aquidauana	Morro do Paxixi Camisão	-20.448	-55.6464	ZUFMS
Leptodactylus_labyrinthicus_MAP_T1067	MT583145	MAP-T1067	Leptodactylus	labyrinthicus	Brazil	Mato Grosso do Sul	Campo Grande	Parque do Sóter	-20.4294	-54.5766	ZUFMS
Leptodactylus_latrans_MAP_T2515	MT583146	MAP-T2515	Leptodactylus	latrans	Brazil	Mato Grosso do Sul	Corumbá	Baía Negra	-19.0222	-57.5106	ZUFMS	Karoline Ceron, Liliana Piatti, Guilherme Sestito, Matheus Moroti, Francisco Severo-Neto
Leptodactylus_mystacinus_MAP_T1731	MT583147	MAP-T1731	Leptodactylus	mystacinus	Brazil	Mato Grosso do sul	Bonito	Estância Mimosa	-20.996	-56.515	ZUFMS	Ferreira. V. G.
Leptodactylus_mystacinus_MAP_T3035	MT583148	MAP-T3035	Leptodactylus	mystacinus	Brazil	Mato Grosso do Sul	Alcinópolis	PENRTaquari (Águas emendadas)	-18.1594	-53.4108	ZUFMS	Santana, D; Sugai, J. L; Carvalho, P.S; Ceron, K; Neves, M; Moroti; Pedrozo, M; Díaz, J; Sestito, G; Folly, H; Oliveira, I.C; Ragalzi, E
Leptodactylus_mystacinus_MAP_T4068	MT583149	MAP-T4068	Leptodactylus	mystacinus	Brazil	Mato Grosso do Sul	Campo Grande	Brejo Bonito	-20.5131	-54.7277	ZUFMS	Moroti, M.; Pedrozo, M.
Leptodactylus_podicipinus_MAP_T173	MT583151	MAP-T173	Leptodactylus	podicipinus	Brazil	Mato Grosso do Sul	Bonito		-21.126	-56.4899	ZUFMS	Santana,D.J.;Sugai,J.L.M.;Dias,R.
Leptodactylus_podicipinus_MAP_T2549	MT583152	MAP-T2549	Leptodactylus	podicipinus	Brazil	Mato Grosso do Sul	Porto Murtinho		-21.6991	-57.8895	ZUFMS	Santana, D.J.; Carvalho, P; Ragalzi, E; Severo Neto, F
Leptodactylus_podicipinus_MAP_T2640	MT583153	MAP-T2640	Leptodactylus	podicipinus	Brazil	Mato Grosso do Sul	Alcinópolis	PENRT	-18.1588	-53.4177	ZUFMS	Karoline Ceron, José L. Massao, Jorge A. Díaz-Perez
Leptodactylus_podicipinus_MAP_T3917	MT583154	MAP-T3917	Leptodactylus	podicipinus	Brazil	Mato Grosso do Sul	Aquidauana	Barranco Alto	-19.5721	-56.1531	ZUFMS	Karoline Ceron e Sarah Mângia
Leptodactylus_podicipinus_MAP_T4506	MT583150	MAP-T4506	Leptodactylus	podicipinus	Brazil	Mato Grosso do Sul	Três Lagoas	Lagoa	-20.7727	-51.7158	ZUFMS	Karoline Ceron, Carla Guimarães, Pedro Rocha
Leptodactylus_podicipinus_DBABA497	KU494559	CFBHT09465	Leptodactylus	podicipinus	Brazil	Mato Grosso do Sul	Corumba		-19.03	-57.545	CFBH	Celio F. B. Haddad
Leptodactylus_syphax_MAP_T1723	MT583155	MAP-T1723	Leptodactylus	syphax	Brazil	Mato Grosso do sul	Corguinho	Serra de Maracaju	-19.8041	-54.9056	ZUFMS	Silva, L.A.; Folly, H.G.; Freitas, R.S.; Bicalho, I.; Galvão, C.
Lysapsus_limellum_MAP_T2573	MT583156	MAP-T2573	Lysapsus	limellum	Brazil	Mato Grosso do Sul	Porto Murtinho		-21.6991	-57.8895	ZUFMS	Santana, D; Carvalho, P; Ragalzi, E; Severo Neto, F
Lysapsus_limellum_MAP_T2455	MT583157	MAP-T2455	Lysapsus	limellum	Brazil	Mato Grosso do Sul	Aquidauana	Barranco Alto	-19.5721	-56.1531	ZUFMS	Karoline Ceron, Liliane Piatti, Guilherme Sestito, Matheus Neves
Physalaemus_albonotatus_MAP_T2707	MT583159	MAP-T2707	Physalaemus	albonotatus	Brazil	Mato Grosso do Sul	Alcinópolis	PENRTaquari (trilha da Sede)	-18.1594	-53.4108	ZUFMS
Physalaemus_albonotatus_DBABA549	DBABA549-12/BOLD	CFBHT04572b	Physalaemus	albonotatus	Brazil	Mato Grosso do Sul	Bonito		-21.157	-56.647	CFBH	Celio F. B. Haddad
Physalaemus_albonotatus_MAP_T1543	MT583160	MAP-T1543	Physalaemus	albonotatus	Brazil	Mato Grosso do sul	Corguinho	Serra de Maracaju	-19.8041	-54.9056	ZUFMS	Silva, L.A.
Physalaemus_albonotatus_MAP_T2535	MT583161	MAP-T2535	Physalaemus	albonotatus	Brazil	Mato Grosso do Sul	Porto Murtinho		-21.6991	-57.8895	ZUFMS	Santana, D; Carvalho, P; Ragalzi, E; Severo Neto, F
Physalaemus_albonotatus_MAP4670	MT583162	MAP4670	Physalaemus	albonotatus	Brazil	Mato Grosso do Sul	Alcinópolis	Parque Estadual das Nascentes do Rio Taquari (PENRT)	-18.1594	-53.4108	ZUFMS
Physalaemus_albonotatus_MAP4858	MT583163	MAP4858	Physalaemus	albonotatus	Brazil	Mato Grosso do Sul	Alcinópolis	Parque Estadual das Nascentes do Rio Taquari	-18.1594	-53.4108	ZUFMS
Physalaemus_albonotatus_MAP5967	MT583164	MAP5967	Physalaemus	albonotatus	Brazil	Mato Grosso do Sul	Coxim		-18.5018	-54.7515	ZUFMS
Physalaemus_albonotatus_MAP5968	MT583165	MAP5968	Physalaemus	albonotatus	Brazil	Mato Grosso do Sul	Coxim		-18.5018	-54.7515	ZUFMS
Physalaemus_albonotatus_MAP5969	MT583166	MAP5969	Physalaemus	albonotatus	Brazil	Mato Grosso do Sul	Coxim		-18.5018	-54.7515	ZUFMS
Physalaemus_biligonigerus_MAP_T1148	MT583167	MAP-T1148	Physalaemus	biligonigerus	Brazil	Mato Grosso do Sul	Aquidauana	Morro do Paxixi Camisão	-20.448	-55.6464	ZUFMS
Physalaemus_biligonigerus_MAP_T2566	MT583168	MAP-T2566	Physalaemus	biligonigerus	Brazil	Mato Grosso do Sul	Porto Murtinho		-21.6991	-57.8895	ZUFMS	Santana, D; Carvalho, P; Ragalzi, E; Severo Neto, F
Physalaemus_centralis_DBABR1787	DBABR1787-13/BOLD	CFBHT16293	Physalaemus	centralis	Brazil	Mato Grosso do Sul	Três Lagoas	Fazenda Bacia da Moeda	-20.77	-51.7101	CFBH
Physalaemus_centralis_DBABR1790	DBABR1790-13/BOLD	CFBHT16297	Physalaemus	centralis	Brazil	Mato Grosso do Sul	Tres Lagoas	Fazenda Bacia da Moeda	-20.77	-51.7101	CFBH
Physalaemus_centralis_DBAFI044	DBAFI044-12/BOLD	CFBHT11571	Physalaemus	centralis	Brazil	Mato Grosso do Sul	Tres Lagoas	Fazenda Bacia da Moeda	-20.77	-51.7101	CFBH
Physalaemus_cuvieri_MAP_T3072	MT583169	MAP-T3072	Physalaemus	cuvieri	Brazil	Mato Grosso do Sul	Alcinópolis	PENRTaquari (Canions 1ª lagoa)	-18.1594	-53.4108	ZUFMS	Santana, D; Sugai, J. L; Carvalho, P.S; Ceron, K; Neves, M; Moroti; Pedrozo, M; Díaz, J; Sestito, G; Folly, H; Oliveira, I.C; Ragalzi, E
Physalaemus_marmoratus_MAP_T3107	MT583170	MAP-T3107	Physalaemus	marmoratus	Brazil	Mato Grosso do Sul	Alcinópolis	PENRTaquari (Canions lagoa Chiasmocleis)	-18.1594	-53.4108	ZUFMS	Santana, D; Sugai, J. L; Carvalho, P.S; Ceron, K; Neves, M; Moroti; Pedrozo, M; Díaz, J; Sestito, G; Folly, H; Oliveira, I.C; Ragalzi, E
Physalaemus_nattereri_MAP_T4070	MT583171	MAP-T4070	Physalaemus	nattereri	Brazil	Mato Grosso do Sul	Campo Grande	Brejo Bonito	-20.5131	-54.7277	ZUFMS	Moroti, M.; Pedrozo, M.
Pithecopus_azureus_MAP_T3105	MT583172	MAP-T3105	Pithecopus	azureus	Brazil	Mato Grosso do Sul	Alcinópolis	PENRTaquari (Canions lagoa Chiasmocleis)	-18.1594	-53.4108	ZUFMS	Santana, D; Sugai, J. L; Carvalho, P.S; Ceron, K; Neves, M; Moroti; Pedrozo, M; Díaz, J; Sestito, G; Folly, H; Oliveira, I.C; Ragalzi, E
Pithecopus_azureus_MAP_T2546	MT583173	MAP-T2546	Pithecopus	azureus	Brazil	Mato Grosso do Sul	Porto Murtinho		-21.6991	-57.8895	ZUFMS	Santana, D; Carvalho, P; Ragalzi, E; Severo Neto, F
Pristimantis_dundeei_MAP_T2849	MT583175	MAP-T2849	Pristimantis	ventrigranulosus	Brazil	Mato Grosso do Sul	Alcinópolis	PENRTaquari (Trilha da Cachoeira)	-18.1594	-53.4108	ZUFMS	Santana, D; Sugai, J. L; Carvalho, P.S; Ceron, K; Neves, M; Moroti; Pedrozo, M; Díaz, J; Sestito, G; Folly, H; Oliveira, I.C; Ragalzi, E
Pristimantis_dundeei_MAP_T2829	MT583174	MAP-T2829	Pristimantis	ventrigranulosus	Brazil	Mato Grosso do Sul	Alcinópolis	PENRTaquari (Trilha da Cateto)	-18.1594	-53.4108	ZUFMS	Santana, D; Sugai, J. L; Carvalho, P.S; Ceron, K; Neves, M; Moroti; Pedrozo, M; Díaz, J; Sestito, G; Folly, H; Oliveira, I.C; Ragalzi, E
Proceratophrys_dibernadoi_MAP_T2744	MT583176	MAP-T2744	Proceratophrys	dibernardoi	Brazil	Mato Grosso do Sul	Alcinópolis	PENRTaquari (Trilha do Cateto)	-18.1594	-53.4108	ZUFMS	Santana, D; Sugai, J. L; Carvalho, P.S; Ceron, K; Neves, M; Moroti; Pedrozo, M; Díaz, J; Sestito, G; Folly, H; Oliveira, I.C; Ragalzi, E
Proceratophrys_dibernadoi_MAP_T2745	MT583177	MAP-T2745	Proceratophrys	dibernardoi	Brazil	Mato Grosso do Sul	Alcinópolis	PENRTaquari (Trilha do Cateto)	-18.1594	-53.4108	ZUFMS	Santana, D; Sugai, J. L; Carvalho, P.S; Ceron, K; Neves, M; Moroti; Pedrozo, M; Díaz, J; Sestito, G; Folly, H; Oliveira, I.C; Ragalzi, E
Pseudis_platensis_MAP_T3112	MT583178	MAP-T3112	Pseudis	platensis	Brazil	Mato Grosso do Sul	Alcinópolis	PENRTaquari (Canions lagoa Chiasmocleis)	-18.1594	-53.4108	ZUFMS	Santana, D; Sugai, J. L; Carvalho, P.S; Ceron, K; Neves, M; Moroti; Pedrozo, M; Díaz, J; Sestito, G; Folly, H; Oliveira, I.C; Ragalzi, E
Pseudis_platensis_MAP_T1384	MT583179	MAP-T1384	Pseudis	platensis	Brazil	Mato Grosso do Sul	Corumbá	Base de Estudos do Pantanal - BEP UFMS	-19.5769	-57.0192	ZUFMS
Pseudopaludicola_mystacalis_MAP_T879	MT583180	MAP-T879	Pseudopaludicola	mystacalis	Brazil	Mato Grosso do Sul	Selvíria	FEPE UNESP Corrego da Véstia	-20.3828	-51.4211	ZUFMS
Rhinella_bergi_MAP_T1382	MT583182	MAP-T1382	Rhinella	bergi	Brazil	Mato Grosso do Sul	Corumbá	Base de Estudos do Pantanal - BEP UFMS	-19.5769	-57.0192	ZUFMS
Rhinella_bergi_MAP_T2552	MT583181	MAP-T2552	Rhinella	bergi	Brazil	Mato Grosso do Sul	Porto Murtinho		-21.6991	-57.8895	ZUFMS	Santana, D; Carvalho, P; Ragalzi, E; Severo Neto, F
Rhinella_schneideri_MAP_T817	MT583183	MAP-T817	Rhinella	diptycha	Brazil	Mato Grosso do Sul	Campo Grande	Fazenda Santa Fé	-20.5388	-54.7514	ZUFMS
Rhinella_schneideri_MAP_T208	MT583184	MAP-T208	Rhinella	diptycha	Brazil	Mato Grosso do Sul	Camapuã	Fazenda 7 Irmãos	-19.0137	-53.8589	ZUFMS	Sugai,J.L.M
Rhinella_schneideri_MAP_T3166	MT583185	MAP-T3166	Rhinella	diptycha	Brazil	Mato Grosso do Sul	Alcinópolis	PENRTaquari (canions)	-18.1594	-53.4108	ZUFMS	Santana, D; Sugai, J. L; Carvalho, P.S; Ceron, K; Neves, M; Moroti; Pedrozo, M; Díaz, J; Sestito, G; Folly, H; Oliveira, I.C; Ragalzi, E
Rhinella_scitula_MAP_T1410	MT583186	MAP-T1410	Rhinella	scitula	Brazil	Mato Grosso do Sul	Bonito	Estância Mimosa	-20.996	-56.515	ZUFMS
Scinax_fuscomarginatus_MAP_T3920	MT583187	MAP-T3920	Scinax	fuscomarginatus	Brazil	Mato Grosso do Sul	Aquidauana	Barranco Alto	-19.5721	-56.1531	ZUFMS	Karoline Ceron e Sarah Mângia
Scinax_fuscomarginatus_MAP_T3065	MT583188	MAP-T3065	Scinax	fuscomarginatus	Brazil	Mato Grosso do Sul	Alcinópolis	PENRTaquari (Canions lagoa elianeae)	-18.1594	-53.4108	ZUFMS	Santana, D; Sugai, J. L; Carvalho, P.S; Ceron, K; Neves, M; Moroti; Pedrozo, M; Díaz, J; Sestito, G; Folly, H; Oliveira, I.C; Ragalzi, E
Scinax_fuscomarginatus_MAP_T787	MT583189	MAP-T787	Scinax	fuscomarginatus	Brazil	Mato Grosso do Sul	Campo Grande	Fazenda Santa Fé	-20.5388	-54.7514	ZUFMS
Scinax_fuscovarius_DBABA63659	KU494759	CFBHT01376	Scinax	fuscovarius	Brazil	Mato Grosso do Sul	Paranaiba		-19.7	-51.143	CFBH	Celio F. B. Haddad
Scinax_fuscovarius_DBABA64063	KU494763	CFBHT04522	Scinax	fuscovarius	Brazil	Mato Grosso do Sul	Bonito		-21.157	-56.647	CFBH	Celio F. B. Haddad
Scinax_fuscovarius_MAP_T2757	MT583190	MAP-T2757	Scinax	fuscovarius	Brazil	Mato Grosso do Sul	Alcinópolis	PENRTaquari (Trilha da Lagoa)	-18.1594	-53.4108	ZUFMS	Santana, D; Sugai, J. L; Carvalho, P.S; Ceron, K; Neves, M; Moroti; Pedrozo, M; Díaz, J; Sestito, G; Folly, H; Oliveira, I.C; Ragalzi, E
Scinax_fuscovarius_MAP_T459	MT583191	MAP-T459	Scinax	fuscovarius	Brazil	Mato Grosso do Sul	Campo Grande	Fazenda Santa Fé	-20.5388	-54.7514	ZUFMS	Placência, J.B.
Scinax_fuscovarius_MAP_T1961	MT583192	MAP-T1961	Scinax	fuscovarius	Brazil	Mato Grosso do Sul	Bonito	Estância Mimosa	-20.996000	-56.515000	ZUFMS	Ferreira, V.G.
Scinax_nasicus_MAP_T2446	MT583193	MAP-T2446	Scinax	nasicus	Brazil	Mato Grosso do Sul	Aquidauana	Barranco Alto	-19.5721	-56.1531	ZUFMS	Karoline Ceron, Liliane Piatti, Guilherme Sestito, Matheus Neves
Scinax_nasicus_MAP_T626	MT583194	MAP-T626	Scinax	nasicus	Brazil	Mato Grosso do Sul	Corumbá	Base de Estudos do Pantanal UFMS	-19.5769	-57.0192	ZUFMS	Santana,D.J.
Scinax_xsignatus_MAP_T3169	MT583195	MAP-T3169	Scinax	x-signatus	Brazil	Mato Grosso do Sul	Alcinópolis	PENRTaquari (canions)	-18.1594	-53.4108	ZUFMS	Santana, D; Sugai, J. L; Carvalho, P.S; Ceron, K; Neves, M; Moroti; Pedrozo, M; Díaz, J; Sestito, G; Folly, H; Oliveira, I.C; Ragalzi, E
Scinax_xsignatus_MAP_T1522	MT583196	MAP-T1522	Scinax	x-signatus	Brazil	Mato Grosso do sul	Dourados		-22.2238	-54.8125	ZUFMS	Duleba, S.
Trachycephalus_typhonius_MAP_T1732	MT583197	MAP-T1732	Trachycephalus	typhonius	Brazil	Mato Grosso do sul	Bonito	Estância Mimosa	-20.996	-56.515	ZUFMS	Ferreira. V. G.
Adenomera_hylaedactyla_KF674611	KF674611	MJ1344	Adenomera	hylaedactyla	Boliva	Beni	Yucuma	Los Lagos	-12.7721	-65.8109
Adenomera_hylaedactyla_KF674615	KF674615	RGA5257	Adenomera	hylaedactyla	Brazil	Mato Grosso	Jauru	UHE Guaporé	-15.3333	-58.85
Adenomera_hylaedactyla_KF674618	KF674618	CTMZ05322	Adenomera	hylaedactyla	Brazil	Mato Grosso	Sapezal		-13.3206	-59.0118
Adenomera_hylaedactyla_KF674619	KF674619	JEH68	Adenomera	hylaedactyla	Brazil	Mato Grosso	Sapezal	PCH Jesuíta
Adenomera_hylaedactyla_KF674665	KF674665	GARI29	Adenomera	hylaedactyla	Brazil	Mato Grosso	Aripuanã		-10.0531	-59.4939
Adenomera_hylaedactyla_KF674666	KF674666	ARI414	Adenomera	hylaedactyla	Brazil	Mato Grosso	Aripuanã		-10.0531	-59.4939
Adenomera_hylaedactyla_KF674667	KF674667	CTMZ05278	Adenomera	hylaedactyla	Brazil	Mato Grosso	Sapezal		-12.9894	-58.7642
Adenomera_hylaedactyla_KF674668	KF674668	977121	Adenomera	hylaedactyla	Brazil	Mato Grosso	Juruena		-10.3236	-58.4928
Adenomera_hylaedactyla_KF674669	KF674669	977122	Adenomera	hylaedactyla	Brazil	Mato Grosso	Juruena		-10.3236	-58.4928
Adenomera_hylaedactyla_KF674671	KF674671	GN35	Adenomera	hylaedactyla	Brazil	Mato Grosso	Guarantã do Norte		-9.7875	-54.91
Adenomera_hylaedactyla_KF674672	KF674672	SJBH180	Adenomera	hylaedactyla	Brazil	Mato Grosso	Juara		-15.3356	-58.8577
Adenomera_hylaedactyla_KF674673	KF674673	SJBH181	Adenomera	hylaedactyla	Brazil	Mato Grosso	Nova Bandeirantes		-9.92205	-57.8352
Adenomera_hylaedactyla_KF674676	KF674676	4996	Adenomera	hylaedactyla	Brazil	Mato Grosso	Campo Verde	APM Manso	-15.15	-55.0667
Adenomera_hylaedactyla_KF674677	KF674677	CG332	Adenomera	hylaedactyla	Brazil	Mato Grosso	Chapada dos Guimarães.		-15.4446	-55.7234
Adenomera_hylaedactyla_KF674678	KF674678	UFMT2	Adenomera	hylaedactyla	Brazil	Mato Grosso	Cuiabá		-15.5961	-56.0389
Adenomera_hylaedactyla_KF674680	KF674680	CTMZ05373	Adenomera	hylaedactyla	Brazil	Mato Grosso	Sapezal	Tesouro	-12.9894	-58.7642
Adenomera_hylaedactyla_KF674681	KF674681	AF1642	Adenomera	hylaedactyla	Brazil	Goias	Luziania	UHE Corumbá 4	-17.9833	-48.5167
Adenomera_hylaedactyla_KF674682	KF674682	MTR21603	Adenomera	hylaedactyla	Brazil	Goias	Pirenópolis		-15.8451	-48.9608
Ameerega_braccata_KU494332	KU494332	MTR_ALCX6P23	Ameerega	braccata	Brazil	Mato Grosso	Rio Manso	APM Manso	-20.224	-44.28
Ameerega_braccata_KU494333	KU494333	MTR_ALCX6P22	Ameerega	braccata	Brazil	Mato Grosso	Rio Manso	APM Manso	-20.224	-44.28
Boana_caingua_MN030256	MN030256	CFBH14697	Boana	caingua	Brazil	São Paulo	Guapiara
Boana_geographica_MG840913	MG840913	MBS65	Boana	geographica	Brazil	Mato Grosso	Comodoro
Boana_geographica_MG840914	MG840914	MPEG40274	Boana	geographica	Brazil	Mato Grosso	Comodoro
Boana_lundii_KU494476	KU494476	CFBHT02106	Boana	lundii	Brazil	Goiás	Alto Paraiso de Goias		-14.031	-47.676		Celio F. B. Haddad
Boana_lundii_KU494477	KU494477	CFBHT01902	Boana	lundii	Brazil	Minas Gerais	São Roque de Minas		-20.192	-46.521		Celio F. B. Haddad
Boana_lundii_KU494478	KU494478	CFBHT12573	Boana	lundii	Brazil	São Paulo	São Carlos		-21.985	-47.879		Celio F. B. Haddad
Boana_lundii_KX697983	KX697983	CFBH 9154	Boana	lundii	Brazil	Minas Gerais	São Roque de Minas
Boana_lundii_KX697984	KX697984	CFBH 9324	Boana	lundii	Brazil	Goiás	Alto Paraiso de Goias
Boana_lundii_KX697991	KX697991	CFBH 20059	Boana	lundii	Brazil	São Paulo	Assis
Boana_lundii_KX697998	KX697998	CFBH 23593	Boana	lundii	Brazil	Goiás	Campo Limpo de Goiás
Boana_lundii_KX697999	KX697999	CFBH 24355	Boana	lundii	Brazil	Minas Gerais	Lagoa Santa
Boana_lundii_KX698001	KX698001	CFBH 26853	Boana	lundii	Brazil	São Paulo	São Carlos
Boana_lundii_KX698004	KX698004	CFBH 22814	Boana	lundii	Brazil	Minas Gerais	Belo Horizonte
Boana_lundii_KX698016	KX698016	MRT8417	Boana	lundii	Brazil	Goiás	Petrolina de Goiás
Dendropsophus_melanargyreous_MAP_T1770	MT583116	MAP-T1770	Dendropsophus	melanargyreous	Brazil	Mato Grosso	Paranaíta	UHE São Manoel			ZUFMS	Pereira, E. A., Silva, L. A.
Dendropsophus_melanargyreous_MAP_T1771	MT583117	MAP-T1771	Dendropsophus	melanargyreous	Brazil	Mato Grosso	Paranaíta	UHE São Manoel			ZUFMS	Pereira, E. A., Silva, L. A.
Dendropsophus_melanargyreous_MAP_T1769	MT583118	MAP-T1769	Dendropsophus	melanargyreous	Brazil	Mato Grosso	Paranaíta	UHE São Manoel			ZUFMS	Pereira, E. A., Silva, L. A.
Haddadus_binotatus_KU494442	KU494442	CFBHT08788	Haddadus	binotatus	Brazil	São Paulo	Peruibe		-24.552	-47.223		Celio F. B. Haddad
Haddadus_binotatus_KU494444	KU494444	CFBHT12655	Haddadus	binotatus	Brazil	Minas Gerais	Congonhas		-20.478	-43.875
Haddadus_binotatus_KU494445	KU494445	CFBHT10637	Haddadus	binotatus	Brazil	São Paulo	Ilha Comprida		-24.984	-47.869		Celio F. B. Haddad
Haddadus_binotatus_KU494446	KU494446	CFBHT06012	Haddadus	binotatus	Brazil	São Paulo	Ilha Bela		-23.863	-45.362		Celio F. B. Haddad
Haddadus_binotatus_KU494448	KU494448	CFBHT12880	Haddadus	binotatus	Brazil	São Paulo	Santo André	Parque Natural Municipal Nascentes de Paranapiacaba	-23.345	-45.136
Haddadus_binotatus_KU494449	KU494449	CFBHT08088	Haddadus	binotatus	Brazil	São Paulo	São Luis do Paraitinga	Nucleo Santa Virginia - PESM	-23.345	-45.136
Haddadus_binotatus_KU494450	KU494450	CFBHT05817	Haddadus	binotatus	Brazil	São Paulo	São Sebastião		-23.806	-45.67		Celio F. B. Haddad
HM778124_Outgroup	HM778124	ZRCRMBR939	Barbourula	kalimantanensis	Singapore
KU494655_Outgroup	KU494655	CFBHT02225	Pipa	carvalhoi	Brazil	Bahia	Porto Seguro		-16.396	-39.049		Celio F. B. Haddad
KY079891_Outgroup	KY079891	USNM:Herp:573443	Xenopus	epitropicalis	Republic of the Congo	Brazzaville	Brazzaville	ca. 20 miles NNE of, vicinity of Mingali	-3.9891	-15.3868		Kate Jackson & students
Leptodactylus_fuscus_KU494523	KU494523	TG071	Leptodactylus	fuscus	Brazil	São Paulo	Lençois Paulista		-22.603	-48.792		Thiago Gazoni
Leptodactylus_fuscus_KU494525	KU494525	CFBHT09510	Leptodactylus	fuscus	Brazil	São Paulo	Teodoro Sampaio		-22.511	-52.317		Celio F. B. Haddad
Leptodactylus_fuscus_KU494526	KU494526	TG072	Leptodactylus	fuscus	Brazil	São Paulo	Lençois Paulista		-22.603	-48.792		Thiago Gazoni
Leptodactylus_fuscus_KU494528	KU494528	CFBHT00515	Leptodactylus	fuscus	Brazil	São Paulo	Itirapina		-23.719	-45.731		Celio F. B. Haddad
Leptodactylus_fuscus_KU494529	KU494529	TG242	Leptodactylus	fuscus	Brazil	Mato Grosso	Paranaita		-9.671	-56.482		Thiago Gazoni
Leptodactylus_latrans_KU494535	KU494535	CFBHT02266	Leptodactylus	latrans	Brazil	São Paulo	São Sebastião		-23.748	-45.413		Celio F. B. Haddad
Leptodactylus_latrans_KU494536	KU494536	CFBHT06487	Leptodactylus	latrans	Brazil	São Paulo	Rio Claro		-22.327	-47.716		Celio F. B. Haddad
Leptodactylus_latrans_KU494537	KU494537	CFBHT11864	Leptodactylus	latrans	Brazil	Paraná	Tibagi		-24.5	-50.419		Celio F. B. Haddad
Leptodactylus_latrans_KU494539	KU494539	CFBHT01723	Leptodactylus	latrans	Brazil	Paraná	Tijucas do Sul		-25.924	-49.173		Celio F. B. Haddad
Leptodactylus_latrans_KU494540	KU494540	CFBHT07725	Leptodactylus	latrans	Brazil	São Paulo	Bauru		-22.235	-49.081		Celio F. B. Haddad
Leptodactylus_latrans_KU494542	KU494542	CFBHT00832	Leptodactylus	latrans	Brazil	Minas Gerais	Camanducaia		-22.886	-46.046		Celio F. B. Haddad
Leptodactylus_sertanejo_KU494562	KU494562	TG083	Leptodactylus	sertanejo	Brazil	Minas Gerais	Uberlândia		-18.779	-48.224		Thiago Gazoni
Leptodactylus_sertanejo_KU494563	KU494563	TG075	Leptodactylus	sertanejo	Brazil	Minas Gerais	Uberlândia		-18.779	-48.224		Thiago Gazoni
Leptodactylus_sertanejo_KU494564	KU494564	TG077	Leptodactylus	sertanejo	Brazil	Minas Gerais	Uberlândia		-18.779	-48.224		Thiago Gazoni
Odontophrynus_americanus_KU494605	KU494605	CFBHT08110	Odontophrynus	americanus	Brazil	Minas Gerais	Airuoca		-22.03	-44.637		Celio F. B. Haddad
Odontophrynus_americanus_KU494606	KU494606	CFBHT09582	Odontophrynus	americanus	Brazil	São Paulo	Teodoro Sampaio		-22.511	-52.317		Celio F. B. Haddad
Odontophrynus_americanus_KU494608	KU494608	CFBHT08110	Odontophrynus	americanus	Brazil	São Paulo	Araçoiaba da Serra		-23.513	-47.634		Celio F. B. Haddad
Osteocephalus_taurinus_MAP_T2363	MT583158	MAP-T2363	Osteocephalus	taurinus	Brazil	Mato Grosso	Paranaíta	Módulo de Monitoramento de fauna da UHE São Manoel, Aragão Margem Esquerda			ZUFMS	Silva, L.A.; Dantas, S. P.
Osteocephalus_taurinus_KF001929	KF001929	PHV 2692	Osteocephalus	taurinus	Brazil	Mato Grosso	Barra do Garça
Osteocephalus_taurinus_KF001930	KF001930	PHV 2439	Osteocephalus	taurinus	Brazil	Mato Grosso	Agua Boa
Osteocephalus_taurinus_KF001931	KF001931	PHV 2454	Osteocephalus	taurinus	Brazil	Mato Grosso	Agua Boa
Osteocephalus_taurinus_KU494616	KU494616	TG319	Osteocephalus	taurinus	Brazil	Mato Grosso	Paranaita		-9.671	-56.482
Physalaemus_cuvieri_JQ627309	JQ627309	91	Physalaemus	cuvieri	Brazil	São Paulo	São Carlos		-21.98	-47.87		K. Rodriguez-C
Physalaemus_nattereri_JQ627311	JQ627311	73	Physalaemus	nattereri	Brazil	São Paulo	São Carlos		-21.98	-47.87		K. Rodriguez-C
Physalaemus_nattereri_KU494648	KU494648	CFBHT00615	Physalaemus	nattereri	Brazil	São Paulo	Rio Claro		-22.327	-47.716		Celio F. B. Haddad
Pseudopaludicola_falcipes_KC520684	KC520684	5468	Pseudopaludicola	falcipes	Brazil	Mato Grosso		APM Manso
Scinax_acuminatus_KJ004281	KJ004281	IIBPH277	Scinax	acuminatus	Paraguay	Neembucu	Estancia San Jose
Scinax_squalirostris_KJ004283	KJ004283	CFBH21975	Scinax	squalirostris	Brazil	São Paulo		Serra da Bocaina
Scinax_squalirostris_KU359532	KU359532	UFMG1061	Scinax	squalirostris	Brazil	Minas Gerais	Santos Dumont		-21.4	-43.52		P.C.A Garcia
Scinax_squalirostris_KU359533	KU359533	UFMG1533	Scinax	squalirostris	Brazil	Minas Gerais	Conceição do Mato Dentro		-19.09	-43.31		F.S.F Leite
Scinax_squalirostris_KU494770	KU494770	CFBHT01415	Scinax	squalirostris	Brazil	Minas Gerais	São Roque de Minas		-20.192	-46.521		Celio F. B. Haddad
Scinax_squalirostris_KU494771	KU494771	CFBHT10334	Scinax	squalirostris	Brazil	São Paulo	São José do Barreiro		-22.719	-44.618		Celio F. B. Haddad
Scinax_squalirostris_KU494772	KU494772	CFBHT15638	Scinax	squalirostris	Brazil	São Paulo	São José do Barreiro	Serra da Bocaina	-22.719	-44.618		Celio F. B. Haddad
Scinax_squalirostris_KU494774	KU494774	CFBHT00502	Scinax	squalirostris	Brazil	São Paulo	Itirapina		-22.242	-47.907
